# Supplementary material
Source: ML conference proceedings conference paper supplement (https://openaccess.thecvf.com/content/CVPR2026/html/Hu_MeanFlow_Transformers_with_CVPR_2026_paper.html)
Supplement: Supplementary file 1 [file Hu_MeanFlow_Transformers_with_CVPR_2026_supplemental.pdf]

## A. Theoretical Analysis of the Trade-off Between Pretrained and One-Point Velocities for Oracle MeanFlow Learning

**Proposition A.1.** For any  $\lambda \in [0, 1]$ , consider the combination of the one-point estimator and the pre-trained teacher velocity

$$\mathbf{w}_\lambda := (1 - \lambda)\hat{\mathbf{v}} + \lambda\mathbf{v}_\phi.$$

Plugging  $\mathbf{w}_\lambda$  into the target  $\mathbf{h}_{\theta^-}^{\text{tgt}}(\mathbf{z}_t, t, s; \mathbf{w})$  (with  $\mathbf{w} = \mathbf{w}_\lambda$ ) yields the corresponding loss  $\mathcal{L}_{\text{MF}}(\theta; \mathbf{w}_\lambda)$ . Consider the following three residuals: the one-point velocity residual, the teacher-oracle velocity residual, and the oracle bias.

$$\begin{aligned}\delta\hat{\mathbf{v}}_t &:= \hat{\mathbf{v}}(\mathbf{z}_t, t) - \mathbf{v}(\mathbf{z}_t, t), \\ \delta\mathbf{v}_t^\phi &:= \mathbf{v}_\phi(\mathbf{z}_t, t) - \mathbf{v}(\mathbf{z}_t, t), \\ \delta\mathbf{h}(\mathbf{z}_t, t, s) &:= \mathbf{h}_{\theta^-}(\mathbf{z}_t, t, s) - \mathbf{h}(\mathbf{z}_t, t, s).\end{aligned}$$

Then the MF loss admits the following decomposition:

$$\mathcal{L}_{\text{MF}}(\theta; \mathbf{w}_\lambda) = \mathbb{E}_{t, \mathbf{z}_t} \left\| \mathbf{h}_{\theta^-} - (\mathbf{h} + \mathbf{B} + \lambda \mathbf{A}_{\theta^-} \delta\mathbf{v}_t^\phi) \right\|^2 + (1 - \lambda)^2 \mathbb{E} \left\| \mathbf{A}_{\theta^-} \delta\hat{\mathbf{v}}_t \right\|^2,$$

where  $\mathbf{B}(\mathbf{z}_t, t, s) := (t - s) \left( \partial_t \delta\mathbf{h} + (\nabla_{\mathbf{x}} \delta\mathbf{h}) \mathbf{v} \right)$  and  $\mathbf{A}_{\theta^-}(\mathbf{z}_t, t, s) := \mathbf{I} - (t - s) \nabla_{\mathbf{x}} \mathbf{h}_{\theta^-}$ .

*Proof.* Throughout the proof we fix  $s$  and suppress the dependence on  $(\mathbf{z}_t, t, s)$  whenever there is no ambiguity. All expectations are taken over  $(t, \mathbf{z}_t)$  and when  $\hat{\mathbf{v}}$  is random (e.g. a Monte-Carlo estimator).

We first derive the affine form of the teacher target around the oracle velocity  $\mathbf{v}$ . Recall from the MF construction that for any proxy velocity  $\mathbf{w}$ , the target associated with  $\mathbf{h}_{\theta^-}$  is

$$\mathbf{h}_{\theta^-}^{\text{tgt}}(\mathbf{z}_t, t, s; \mathbf{w}) = \mathbf{w} - (t - s) \left( (\nabla_{\mathbf{x}} \mathbf{h}_{\theta^-}) \mathbf{w} + \partial_t \mathbf{h}_{\theta^-} \right),$$

so for two velocities  $\mathbf{w}$  and  $\mathbf{v}$  we have

$$\begin{aligned}\mathbf{h}_{\theta^-}^{\text{tgt}}(\mathbf{z}_t, t, s; \mathbf{w}) - \mathbf{h}_{\theta^-}^{\text{tgt}}(\mathbf{z}_t, t, s; \mathbf{v}) &= \left[ \mathbf{w} - (t - s) (\nabla_{\mathbf{x}} \mathbf{h}_{\theta^-}) \mathbf{w} \right] - \left[ \mathbf{v} - (t - s) (\nabla_{\mathbf{x}} \mathbf{h}_{\theta^-}) \mathbf{v} \right] \\ &= (\mathbf{I} - (t - s) \nabla_{\mathbf{x}} \mathbf{h}_{\theta^-}) (\mathbf{w} - \mathbf{v}).\end{aligned}$$

By the definition of  $\mathbf{A}_{\theta^-}$  in the proposition,  $\mathbf{A}_{\theta^-} := \mathbf{I} - (t - s) \nabla_{\mathbf{x}} \mathbf{h}_{\theta^-}$ , so this can be written as

$$\mathbf{h}_{\theta^-}^{\text{tgt}}(\mathbf{z}_t, t, s; \mathbf{w}) = \mathbf{h}_{\theta^-}^{\text{tgt}}(\mathbf{z}_t, t, s; \mathbf{v}) + \mathbf{A}_{\theta^-}(\mathbf{z}_t, t, s) (\mathbf{w} - \mathbf{v}(\mathbf{z}_t, t)).$$

On the other hand, by the PDE relation between the oracle flow map  $\mathbf{h}$  and the oracle velocity  $\mathbf{v}$ , and by the definition  $\delta\mathbf{h} = \mathbf{h}_{\theta^-} - \mathbf{h}$  and  $\mathbf{B}(\mathbf{z}_t, t, s) := (t - s) \left( \partial_t \delta\mathbf{h} + (\nabla_{\mathbf{x}} \delta\mathbf{h}) \mathbf{v} \right)$ , we have (see the derivation in the main text)

$$\mathbf{h}_{\theta^-}^{\text{tgt}}(\mathbf{z}_t, t, s; \mathbf{v}) = \mathbf{h}(\mathbf{z}_t, t, s) + \mathbf{B}(\mathbf{z}_t, t, s).$$

Combining the last two displays gives, for every proxy velocity  $\mathbf{w}$ ,

$$\mathbf{h}_{\theta^-}^{\text{tgt}}(\mathbf{z}_t, t, s; \mathbf{w}) = \mathbf{h}(\mathbf{z}_t, t, s) + \mathbf{B}(\mathbf{z}_t, t, s) + \mathbf{A}_{\theta^-}(\mathbf{z}_t, t, s) (\mathbf{w} - \mathbf{v}(\mathbf{z}_t, t)), \quad (5)$$

which is exactly the affine reparametrization of the target around the oracle velocity  $\mathbf{v}$ .

We now prove the claimed decomposition of the MF loss. By the definitions of the residual velocities,

$$\hat{\mathbf{v}} = \mathbf{v} + \delta\hat{\mathbf{v}}_t, \quad \mathbf{v}_\phi = \mathbf{v} + \delta\mathbf{v}_t^\phi,$$

the mixed velocity satisfies, for any  $\lambda \in [0, 1]$ ,

$$\mathbf{w}_\lambda = (1 - \lambda)\hat{\mathbf{v}} + \lambda\mathbf{v}_\phi = (1 - \lambda)(\mathbf{v} + \delta\hat{\mathbf{v}}_t) + \lambda(\mathbf{v} + \delta\mathbf{v}_t^\phi) = \mathbf{v} + (1 - \lambda)\delta\hat{\mathbf{v}}_t + \lambda\delta\mathbf{v}_t^\phi. \quad (6)$$

Substituting  $\mathbf{w} = \mathbf{w}_\lambda$  and Equation (6) into Equation (5) yields

$$\begin{aligned}\mathbf{h}_{\theta^-}^{\text{tgt}}(\mathbf{z}_t, t, s; \mathbf{w}_\lambda) &= \mathbf{h} + \mathbf{B} + \mathbf{A}_{\theta^-}(\mathbf{w}_\lambda - \mathbf{v}) \\ &= \mathbf{h} + \mathbf{B} + \mathbf{A}_{\theta^-}((1 - \lambda)\delta\hat{\mathbf{v}}_t + \lambda\delta\mathbf{v}_t^\phi) \\ &= \mathbf{h}(\mathbf{z}_t, t, s) + \mathbf{B}(\mathbf{z}_t, t, s) + \lambda\mathbf{A}_{\theta^-}(\mathbf{z}_t, t, s)\delta\mathbf{v}_t^\phi + (1 - \lambda)\mathbf{A}_{\theta^-}(\mathbf{z}_t, t, s)\delta\hat{\mathbf{v}}_t.\end{aligned}\quad (7)$$

For the remainder of the proof we fix  $(t, \mathbf{z}_t)$  and abbreviate

$$\mathbf{h}_\theta := \mathbf{h}_\theta(\mathbf{z}_t, t, s), \quad \mathbf{h} := \mathbf{h}(\mathbf{z}_t, t, s), \quad \mathbf{A}_{\theta^-} := \mathbf{A}_{\theta^-}(\mathbf{z}_t, t, s), \quad \mathbf{B} := \mathbf{B}(\mathbf{z}_t, t, s).$$

By Equation (2), the MF loss at  $\mathbf{w}_\lambda$  is

$$\mathcal{L}_{\text{MF}}(\theta; \mathbf{w}_\lambda) = \mathbb{E} \left\| \mathbf{h}_\theta(\mathbf{z}_t, t, s) - \mathbf{h}_{\theta^-}^{\text{tgt}}(\mathbf{z}_t, t, s; \mathbf{w}_\lambda) \right\|_2^2.$$

Using Equation (7), we can write the pointwise residual as

$$\mathbf{h}_\theta - \mathbf{h}_{\theta^-}^{\text{tgt}}(\mathbf{z}_t, t, s; \mathbf{w}_\lambda) = \left[ \mathbf{h}_\theta - (\mathbf{h} + \mathbf{B} + \lambda\mathbf{A}_{\theta^-}\delta\mathbf{v}_t^\phi) \right] - (1 - \lambda)\mathbf{A}_{\theta^-}\delta\hat{\mathbf{v}}_t.$$

Let

$$\mathbf{Y} := \mathbf{h}_\theta - (\mathbf{h} + \mathbf{B} + \lambda\mathbf{A}_{\theta^-}\delta\mathbf{v}_t^\phi),$$

so that

$$\mathbf{h}_\theta - \mathbf{h}_{\theta^-}^{\text{tgt}}(\mathbf{z}_t, t, s; \mathbf{w}_\lambda) = \mathbf{Y} - (1 - \lambda)\mathbf{A}_{\theta^-}\delta\hat{\mathbf{v}}_t.$$

Therefore

$$\mathcal{L}_{\text{MF}}(\theta; \mathbf{w}_\lambda) = \mathbb{E} \left\| \mathbf{Y} - (1 - \lambda)\mathbf{A}_{\theta^-}\delta\hat{\mathbf{v}}_t \right\|_2^2 = \mathbb{E} \|\mathbf{Y}\|_2^2 - 2(1 - \lambda)\mathbb{E} \langle \mathbf{Y}, \mathbf{A}_{\theta^-}\delta\hat{\mathbf{v}}_t \rangle + (1 - \lambda)^2 \mathbb{E} \|\mathbf{A}_{\theta^-}\delta\hat{\mathbf{v}}_t\|_2^2. \quad (8)$$

Since the one-point estimator is conditionally unbiased:

$$\mathbb{E}[\hat{\mathbf{v}}(\mathbf{z}_t, t) \mid \mathbf{z}_t] = \mathbf{v}(\mathbf{z}_t, t), \quad \text{so} \quad \mathbb{E}[\delta\hat{\mathbf{v}}_t \mid \mathbf{z}_t] = \mathbf{0}.$$

For fixed  $(t, \mathbf{z}_t)$ , the quantities  $\mathbf{h}_\theta, \mathbf{h}, \mathbf{B}, \mathbf{v}, \mathbf{v}_\phi$ , hence  $\mathbf{Y}$  and  $\mathbf{A}_{\theta^-}$ , are deterministic, and the only randomness comes from the internal noise of  $\hat{\mathbf{v}}$ . Thus

$$\begin{aligned}\mathbb{E} \langle \mathbf{Y}, \mathbf{A}_{\theta^-}\delta\hat{\mathbf{v}}_t \rangle &= \mathbb{E}_{t, \mathbf{z}_t} \left[ \mathbb{E}[\langle \mathbf{Y}, \mathbf{A}_{\theta^-}\delta\hat{\mathbf{v}}_t \rangle \mid \mathbf{z}_t] \right] \\ &= \mathbb{E}_{t, \mathbf{z}_t} \left[ \langle \mathbf{Y}, \mathbf{A}_{\theta^-} \mathbb{E}[\delta\hat{\mathbf{v}}_t \mid \mathbf{z}_t] \rangle \right] \\ &= \mathbb{E}_{t, \mathbf{z}_t} \langle \mathbf{Y}, \mathbf{A}_{\theta^-} \cdot \mathbf{0} \rangle = \mathbf{0}.\end{aligned}$$

Hence the cross term in Equation (8) is zero, and we obtain

$$\mathcal{L}_{\text{MF}}(\theta; \mathbf{w}_\lambda) = \mathbb{E}_{t, \mathbf{z}_t} \left\| \mathbf{h}_\theta(\mathbf{z}_t, t, s) - (\mathbf{h}(\mathbf{z}_t, t, s) + \mathbf{B}(\mathbf{z}_t, t, s) + \lambda\mathbf{A}_{\theta^-}(\mathbf{z}_t, t, s)\delta\mathbf{v}_t^\phi) \right\|_2^2 + (1 - \lambda)^2 \mathbb{E} \|\mathbf{A}_{\theta^-}(\mathbf{z}_t, t, s)\delta\hat{\mathbf{v}}_t\|_2^2,$$

which is exactly the claimed decomposition Equation (4). This completes the proof.  $\square$

From Proposition 3.1, several implications follow. First, using the pre-trained velocity  $\mathbf{v}_\phi$  improves stability: when  $\lambda = 1$ , the noisy one-point term vanishes, which reduces gradient variance and typically stabilizes and accelerates optimization.

Second, this comes at the cost of bias. The model no longer regresses to  $\mathbf{h}$ , but to  $\mathbf{h} + \mathbf{B} + \lambda\mathbf{A}_{\theta^-}\delta\mathbf{v}_s^\phi$ . When  $\mathbf{v}_\phi$  is accurate (small  $\delta\mathbf{v}_s^\phi$ ) and the time step is small so that  $\mathbf{A}_{\theta^-} \approx \mathbf{I}$ , this additional bias is small. In the small-step regime, the shift is approximately  $\lambda\delta\mathbf{v}_s^\phi$ , so the practical target is close to the oracle one whenever  $\|\delta\mathbf{v}_s^\phi\|$  is small. However, under domain shift,  $\delta\mathbf{v}_s^\phi$  can be non-negligible and the learned  $\mathbf{h}_\theta$  will partially compensate for this mismatch.

Third, the mixing weight  $\lambda$  offers a natural tuning mechanism. A schedule with  $\lambda$  gradually increasing to 1 can start from a regime with low bias and low variance: initially, the one-point label maintains an unbiased target while the pre-trained signal reduces variance; later, larger  $\lambda$  leverages the smoothness of  $\mathbf{v}_\phi$  for stable convergence. In practice, we use a simple two-stage schedule:  $\lambda = 0$  in the distillation stage and  $\lambda = 1$  in the (optional) bootstrapping stage.

Finally, the coupling to the self-teacher remains simple. Both  $\mathbf{B}$  and  $\mathbf{A}_{\theta^-}$  are treated as stop-gradient with respect to  $\theta^-$ , so updates in  $\theta$  still solve a least-squares fit to a shifted target. As the self-teacher improves over training,  $\delta\mathbf{h}$  shrinks and  $\mathbf{B}$  decreases, further reducing the induced bias.

## B. More Hyperparameter Settings

**MF-RAE’s Flow Matching Pre-Training Setup.** We directly use the flow matching model checkpoint provided by RAE [48], where the model on ImageNet 256 is trained for 800 epochs, and that on ImageNet 512 is trained for 400 epochs.

**MF-RAE’s CMT Setup.** The CMT stage’s learning rate is also  $1e-4$ , but the EMA  $\beta$  is set to 0.999 for faster convergence, thanks to CMT’s stability and fixed target.

**MF-RAE’s CMT Setup on ImageNet 256.** CMT generates eight trajectories from the teacher DiT<sup>DH</sup>-XL without guidance during each iteration. We use the Euler ODE solver with 16 steps (FID=2.3). For each trajectory, it generates  $16 \times 15/2 = 120$  pairs, but we randomly select 64 pairs for optimization to fit on the H100 GPU. The total batch size is thus  $64 \times 8 = 512$  pairs. We conduct this training on 8 H100 GPUs for 27K iterations.

**MF-RAE’s CMT Setup on ImageNet 512.** CMT generates two trajectories from the teacher DiT<sup>DH</sup>-XL without guidance during each iteration. We use the Euler ODE solver with 16 steps (FID=1.66 without any guidance). For each trajectory, we randomly select 8 pairs for optimization to fit on the H100 GPU. The total batch size is thus  $8 \times 2 = 16$  pairs. We accumulate gradients for eight rounds to enlarge the batch size. We conduct this training on 2 H100 GPUs for 27K iterations.

## C. Generated Samples

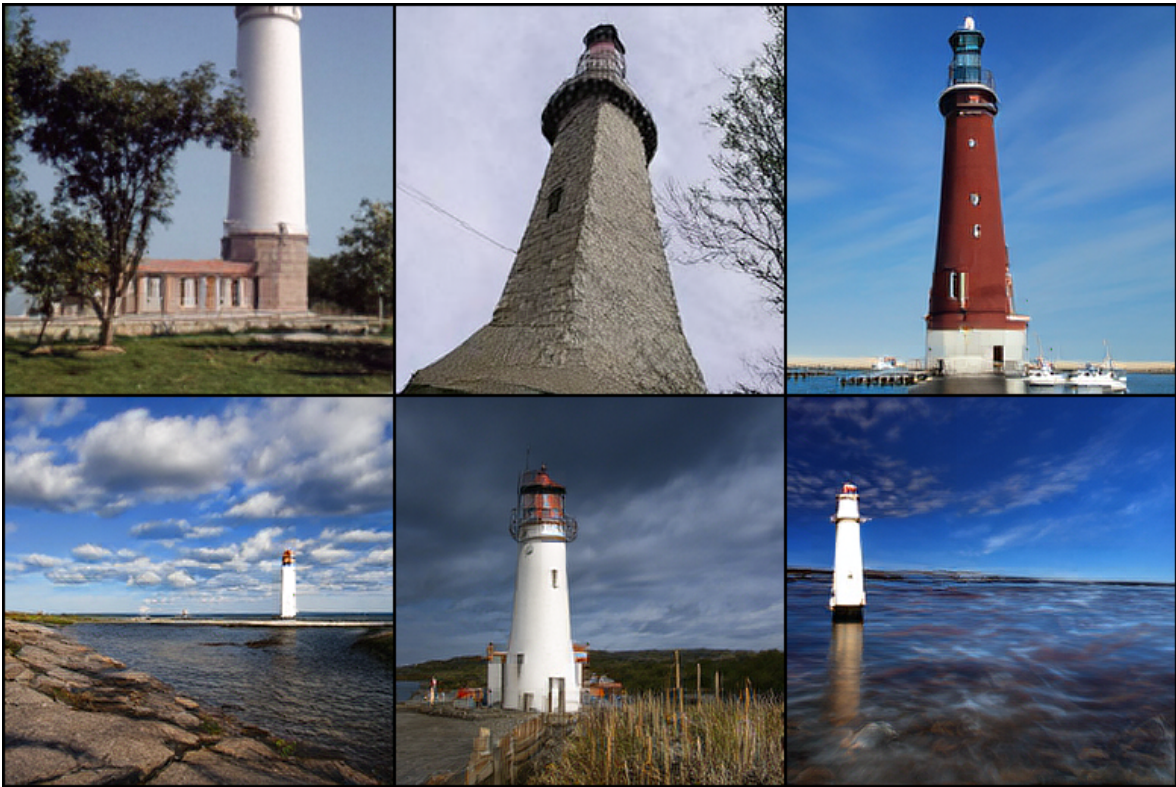

Figure 2. ImageNet 256 MF-RAE 1-step samples on class 437: beacon, lighthouse, beacon light, pharos.

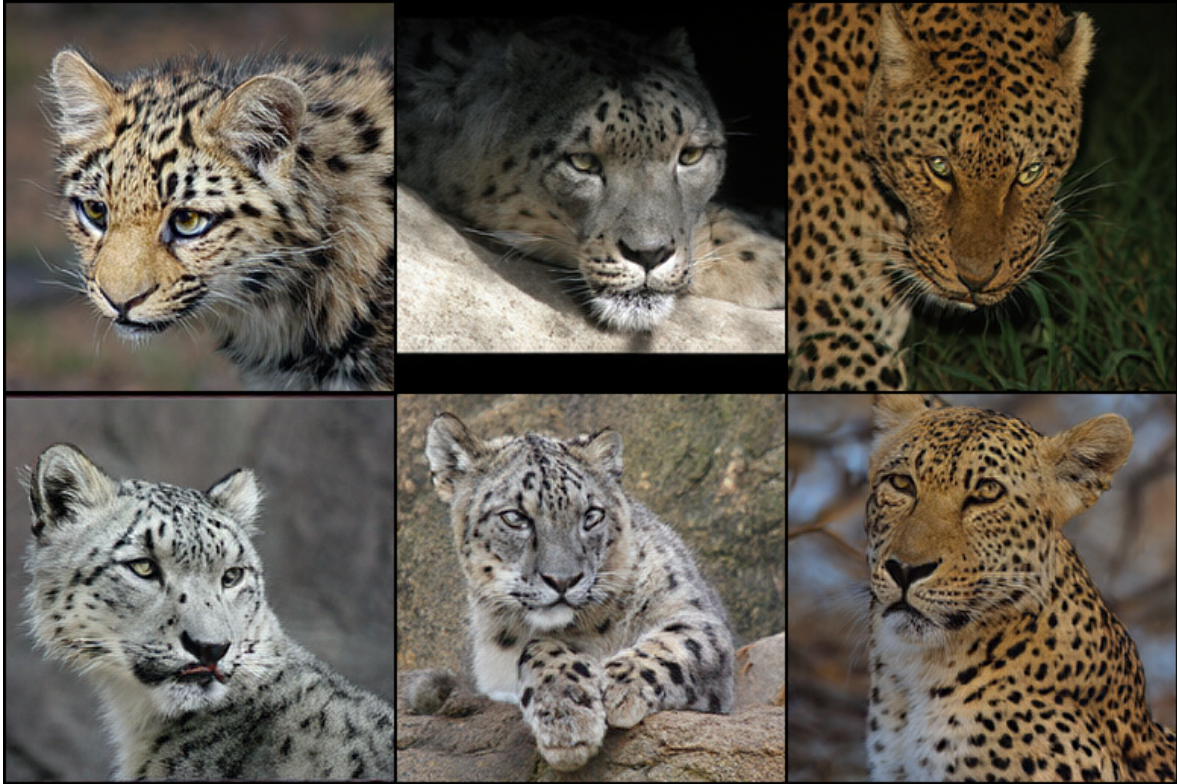

Figure 3. ImageNet 256 MF-RAE 1-step samples on classes 288 and 290: leopard and snow leopard.

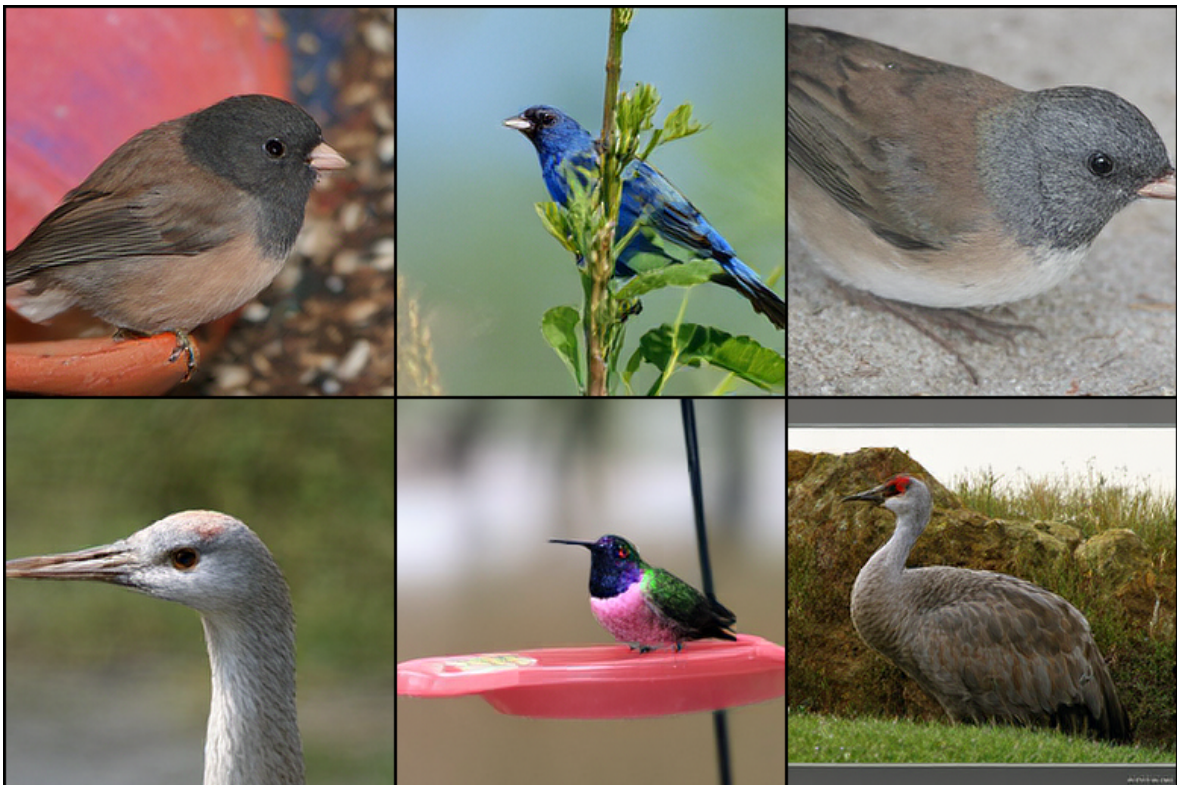

Figure 4. ImageNet 256 MF-RAE 1-step samples on classes 13, 14, 94, and 134: snowbird, indigo bird, hummingbird, and crane bird.

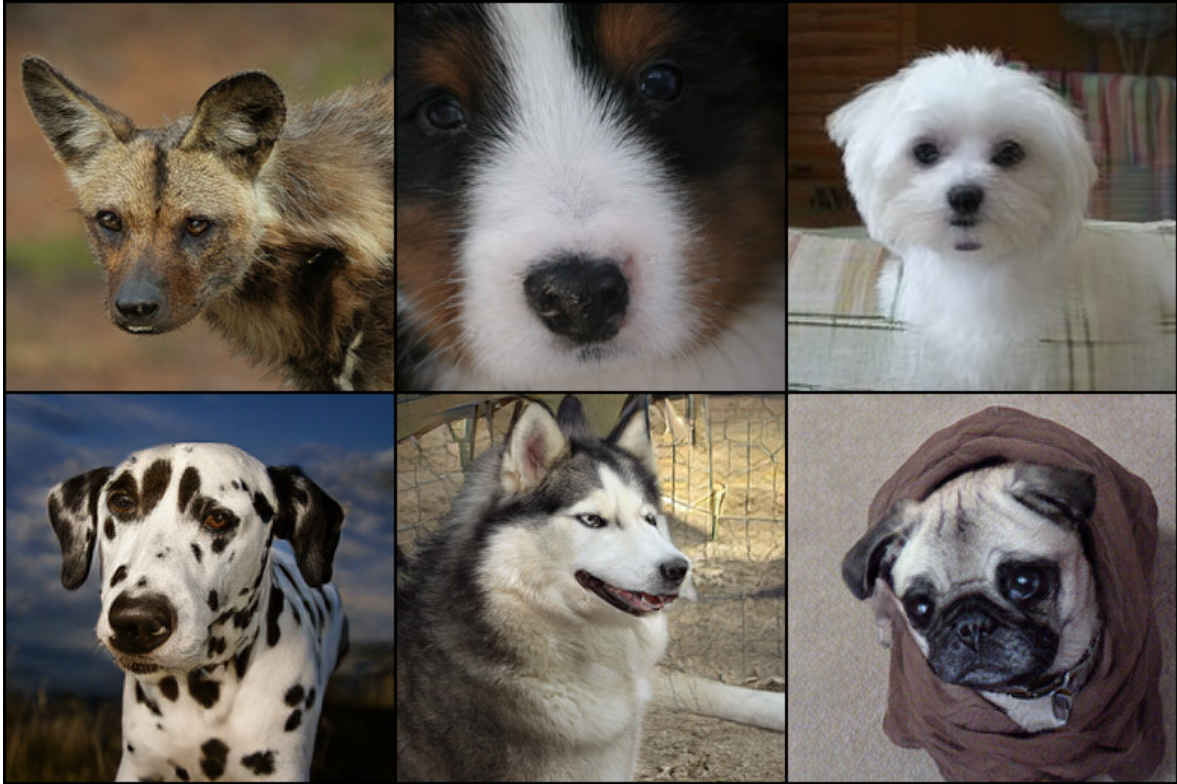

Figure 5. ImageNet 256 MF-RAE 1-step samples for various dogs.

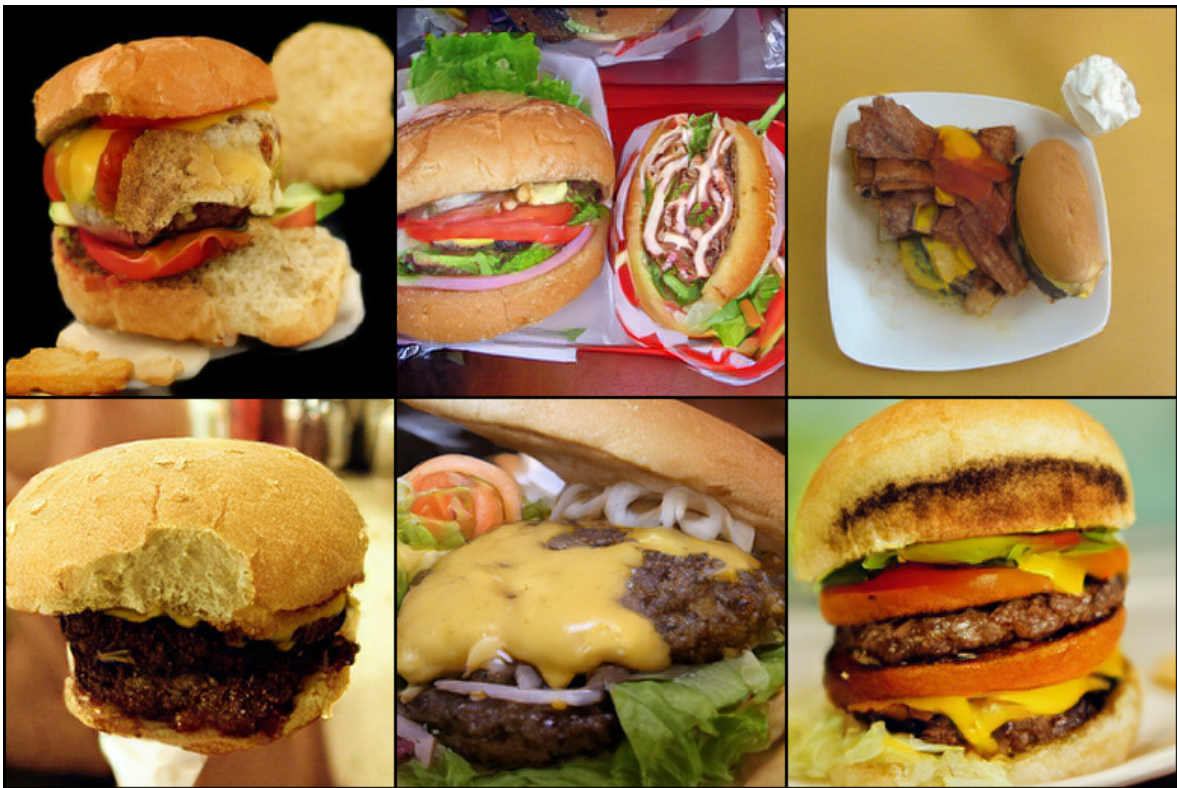

Figure 6. ImageNet 256 MF-RAE 1-step samples for class 933: cheeseburger.

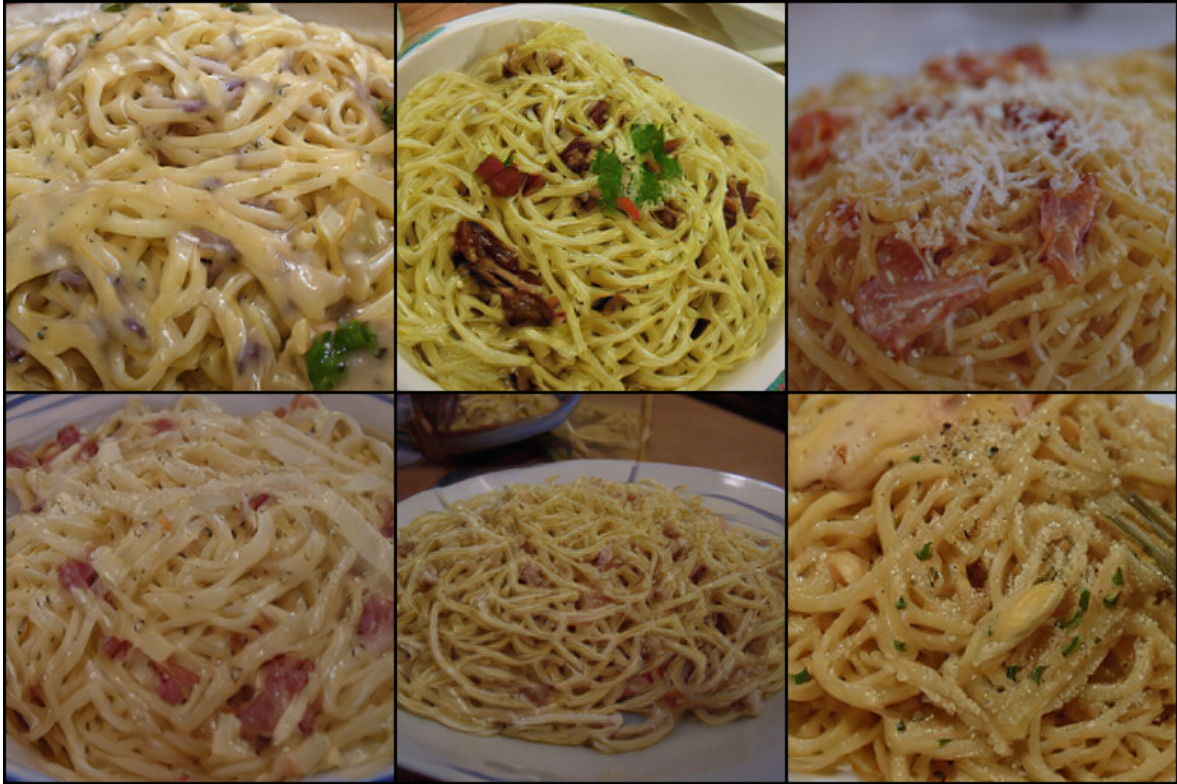

Figure 7. ImageNet 256 MF-RAE 1-step samples for class 959: carbonara.

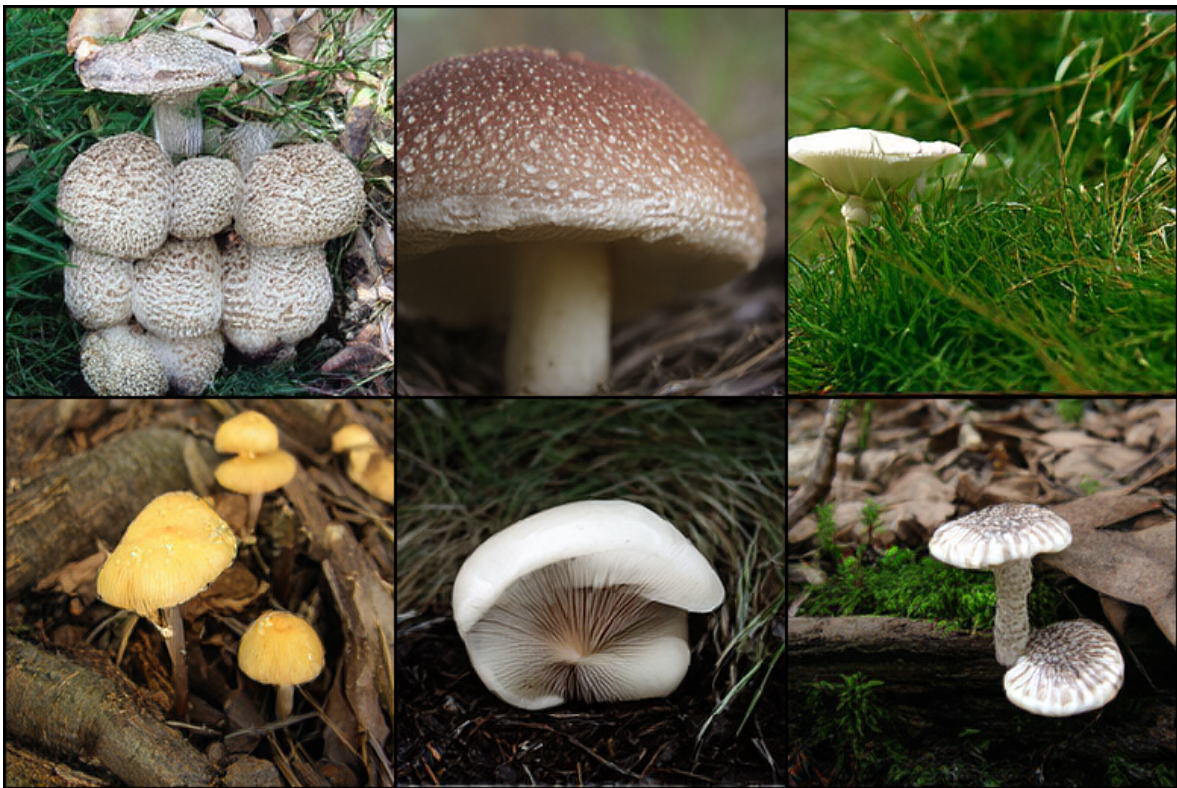

Figure 8. ImageNet 256 MF-RAE 1-step samples for class 947: mushroom.
